# Supplementary material
Source: publisher figshare collection journal article supplement (https://sage.figshare.com/ndownloader/files/23454518)
Supplement: Supplementary file 1 [file 23454518]

# NATIONAL RESEARCH CENTRE ON EQUINES

## SIRSA ROAD, HISAR

### IAEC, NRCE, Meeting 2017-Proceedings

**NRCE/CPCSEA/2017-18 DATED**

**18/09/2017**

A MEETING OF THE Institute Animal Ethics Committee (IAEC) was held on 18/09/2017 at 1100 AM under the Chairmanship of Dr Nitin Virmani, Principal Scientist, NRCE, Hisar in the Committee room of National Research Centre on Equines, Hisar, Haryana to examine the requirement of experimental animals, in various research products of the NRCE, Hisar. The IAEC critically examined the proposals. Following officials were present in the meeting:-

Dr Nitin Virmani, Chairman, IAEC (NRCE, Hisar)

Dr Harbans Lal- Main CPCSEA Nominee

Dr Suresh Kumar- Scientist from Outside the Institute

Mr Anil Kamboj- (Non-Scientific Socially Aware Member)

Dr Balwinder Kumar, Senior Scientist, I/c Animal House

Dr R K Vaid, Scientist from different biological Discipline, Member Secretary

**Proposals submitted by scientists for the consideration and their status regarding approval by IAEC**

| S.No                 | Name of the project                                                                                                                                                   | Project                                                                              | Principal Investigator               | Requirement                                                                         | Approved/ Not Approved |
|----------------------|-----------------------------------------------------------------------------------------------------------------------------------------------------------------------|--------------------------------------------------------------------------------------|--------------------------------------|-------------------------------------------------------------------------------------|------------------------|
| <b>Small Animals</b> |                                                                                                                                                                       |                                                                                      |                                      |                                                                                     |                        |
| 1                    | Development of rapid diagnostic (LFA) for equine piroplasmosis                                                                                                        | NRCE Institutional Project                                                           | Dr Sanjay Kumar, Principal Scientist | BALB/c Mice; adult; of either sex; 20 numbers                                       | Approved               |
| 2                    | <i>In vitro</i> growth inhibitory efficacy of different herbal plant extracts against <i>Theileria equi</i> and identification of principal drug molecule(s) thereof. | NRCE Institutional Project                                                           | Dr Sanjay Kumar, Principal Scientist | Adult Albino Mice of either sex; 80 numbers                                         | Approved               |
| 3.                   | Nanobased therapeutic interventions against osteoarthritis                                                                                                            | NRCE Institutional Project                                                           | Dr Anju Manuja, Principal Scientist  | 16 rabbits of either sex                                                            | Approved               |
| 4                    | Molecular epidemiology of Japanese encephalitis virus in pigs and mosquitoes in Assam                                                                                 | Department of Biotechnology, Biotechnology Programme Management Cell, Govt. of India | Dr B R Gulati, Principal Scientist   | Guinea pigs and mice; Either sex for guinea pigs & BALB/c mice; female mother mice; | Approved               |



|    |                                                                                                                                                                                                                                                                                                                                                   |                                           |                                       |                                                                                                              |          |
|----|---------------------------------------------------------------------------------------------------------------------------------------------------------------------------------------------------------------------------------------------------------------------------------------------------------------------------------------------------|-------------------------------------------|---------------------------------------|--------------------------------------------------------------------------------------------------------------|----------|
|    |                                                                                                                                                                                                                                                                                                                                                   |                                           |                                       | Number to be used; 4 G. pigs (16-17); Mice, mother with babies; 200 (2016-17) and Balb/c mice: 200 (2016-17) |          |
| 5  | Generation of recombinant <i>Equine Herpesviruses</i> 1 through BAC mediated deletion mutagenesis and their comparative pathogenicity and immunogenicity in murine model                                                                                                                                                                          | NRCE, Hisar, Student Thesis research Work | Dr Nitin Virmani, Principal Scientist | BALB/c Mice of either sex and 4-5 week age; Number required 267                                              | Approved |
| 6  | Development of diagnostics for emergency preparedness and monitoring of emerging equine viral diseases                                                                                                                                                                                                                                            | NRCE Institutional Project                | Dr Balwinder Manuja, Pr. Scientist    | 8 Nos of adult rabbits of either sex                                                                         | Approved |
| 7  | Phenotypic and genotypic Authentication and preservation of network bacterial isolates                                                                                                                                                                                                                                                            | NRCE Institutional Project                | Dr R K Vaid, Pr. Scientist            | 25 mice, 5 Guinea pigs; either sex                                                                           | Approved |
| 8  | Development of bacteriophage repository and exploring the therapeutic potential of phages and their encoded endolysins                                                                                                                                                                                                                            | NRCE Institutional Project                | Dr Taruna Anand, Scientist            | Lactating mice, ~ 1 week after giving birth, 25-30 g, 6-8 weeks, 100 numbers                                 | Approved |
| 9  | Development of bacteriophage repository and exploring the therapeutic potential of phages and their encoded endolysins (Institutional project)/ Development of phage and engineered endolysin based therapeutics for treatment of major diseases of livestock and poultry in the era of emerging antimicrobial resistance (Proposed project-NASF) | NRCE Institutional Project                | Dr Taruna Anand, Scientist            | Poultry birds, ~1week, 130 numbers                                                                           | Approved |
| 10 | Development of sensitive and specific diagnostic assays for detection of <i>Trypanosoma evansi</i> infection in animals using modern molecular tools                                                                                                                                                                                              | National Fellow Project                   | Dr Rajender Kumar, National Fellow    | Adult Swiss Albino Mice (72) and BALB/c (30) mice of either sex                                              | Approved |
| 11 | Surveillance, monitoring, and control of emerging and existing diseases of equines                                                                                                                                                                                                                                                                | NRCE Institutional Project                | Dr Harisankar Singha                  | Guinea pigs: 40; Swiss Albino mice: 190; Balb/c Mice:60;                                                     | Approved |



|                      |                                                                                                     |                               |                       |                                                           |                                                                            |
|----------------------|-----------------------------------------------------------------------------------------------------|-------------------------------|-----------------------|-----------------------------------------------------------|----------------------------------------------------------------------------|
|                      |                                                                                                     |                               |                       | Rabbit: 4 and<br>poultry: 10                              |                                                                            |
| <b>LARGE ANIMALS</b> |                                                                                                     |                               |                       |                                                           |                                                                            |
| 12                   | Exploration of genomic signatures for indigenous horses using next-generation sequencing approaches | NRCE, Project                 | Dr Anuradha Bharadwaj | Blood and saliva collection from 200-250 number of horses | Approved                                                                   |
| 13                   | CRP on Vaccines and diagnostics- Refinement of EHV1 vaccine                                         | ICAR funded project under CRP | Dr Nitin Virmani      | Pregnant ponies: 18                                       | Recommended to be sent to CPCSEA Large Animal committee for final approval |

The Committee also visited the experimental sheds/facilities and was satisfied with the facilities existing in this centre. The IAEC members emphasized on the fact that form B filled by the Scientist should be complete in all respects including detailed procedures for the experiment, methodologies adapted for euthanasia/ rehabilitation etc.

It was recommended that Scientist should maintain the records and adhere to use the approved experimental animals as per their approved research projects submitted to CPCSEA for approval.

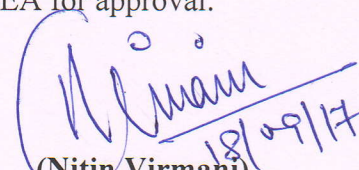  
(Nitin Virmani)  
18/09/17  
Chairman, IAEC

Copy to:

1. All Scientists, NRCE main campus and NCVTC, NRCE, Hisar
2. I/C EPC Bikaner with the request that the same may please be circulated to all Scientists at EPC, Bikaner
3. Director, NRCE for information and n/a, please.
4. AO, NRCE, Hisar for information, please
5. Notice Board
